# Supplementary material
Source: bioRxiv or medRxiv preprint supplement (https://www.biorxiv.org/highwire/filestream/66262/field_highwire_adjunct_files/0/175810-1.pdf)

A.

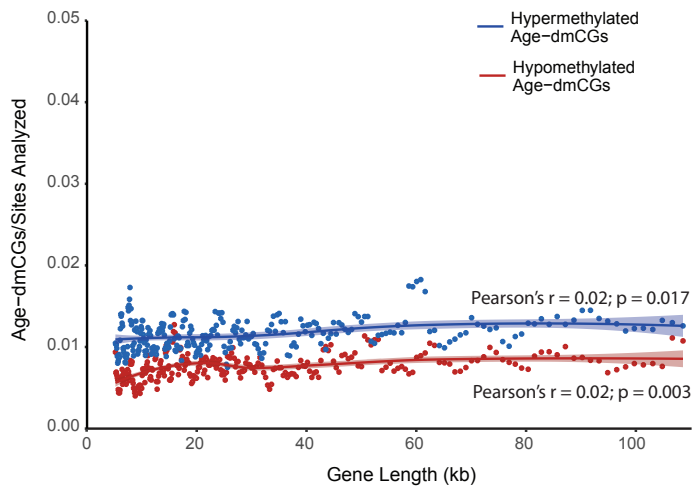

B.

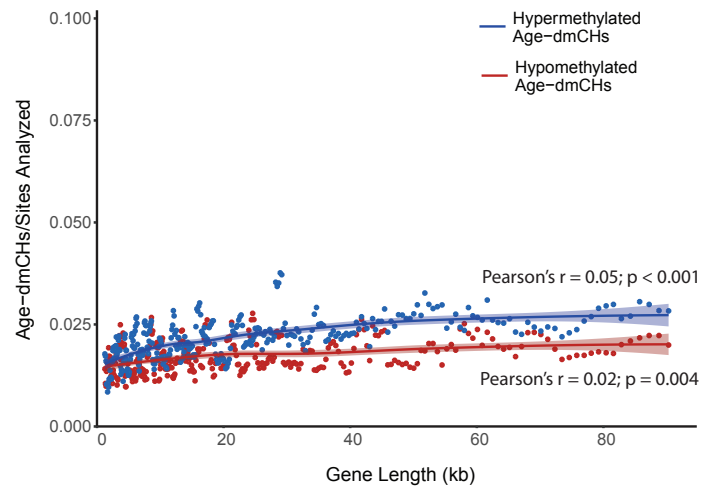

Supplement: Supplementary file [file 175810-1.pdf]
